# Supplementary material for: Intrinsic carnosine metabolism in the human kidney
Source: PubMed Central journal article supplement (PMC4633449; doi:10.1007/s00726-015-2045-7), 2015-07-24
Supplement: 726_2015_2045_MOESM1_ESM.pdf [file 726_2015_2045_MOESM1_ESM.pdf]

## Supplementary data to Amino Acids

### Intrinsic carnosine metabolism in the human kidney

**Authors:** Verena Peters<sup>1\*</sup>, Celine Klessens<sup>2\*</sup>, Hans J. Baelde<sup>2</sup>, Benjamin Singler<sup>1</sup>, Kimberley Veraar<sup>2</sup>, Ana Zutinic<sup>2</sup>, Jakub Drozak<sup>3</sup>, Johannes Zschocke<sup>4</sup>, Claus P. Schmitt<sup>1</sup>, Emile de Heer<sup>2</sup>  
\*: These authors contributed equally to this paper

**Affiliations:** 1: University Children's Hospital, University of Heidelberg, Germany, 2: Dept. of Pathology, Leiden University Medical Center, The Netherlands, 3: Dept. of Metabolic Regulation, Faculty of Biology, University of Warsaw, Poland, 4: Dept. of Human Genetics, Med. Univ. of Innsbruck, Austria

#### Correspondence:

Celine Q.F. Klessens  
Department of Pathology  
Leiden University Medical Center, L1Q  
Room P0-107  
P.O. Box 9600  
2300 RC Leiden  
The Netherlands  
E-mail: [c.q.f.klessens@lumc.nl](mailto:c.q.f.klessens@lumc.nl)  
Telephone: +31(0)71-526 5008  
Fax: +31 (0)71-526 6952

## Supplementary data

### Supplementary figure 1.

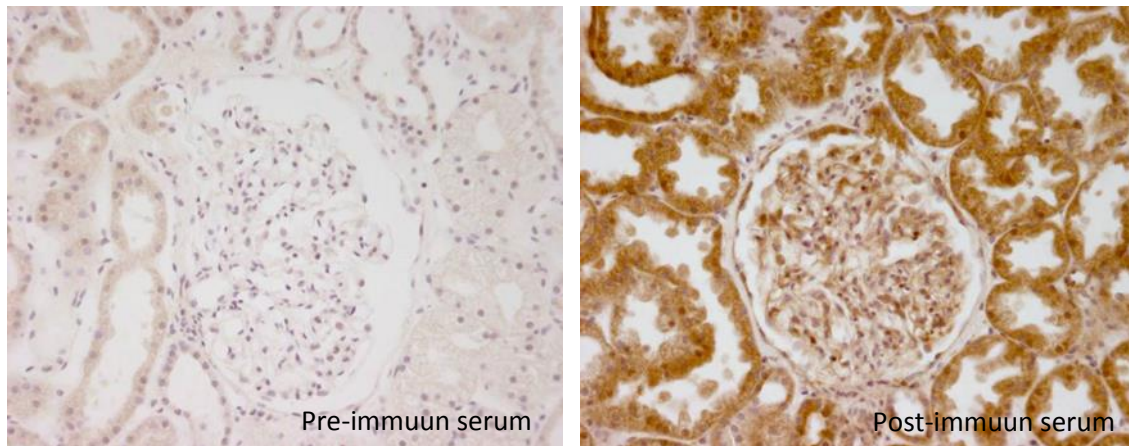

### Supplementary figure 1. Carnosinase-1 (CNDP1) antibody specificity

Serum from rabbits immunized by CNDP1 for peptide inhibition. Pre-immun serum is negative control and post-immun serum is positive control.

### Supplementary figure 2.

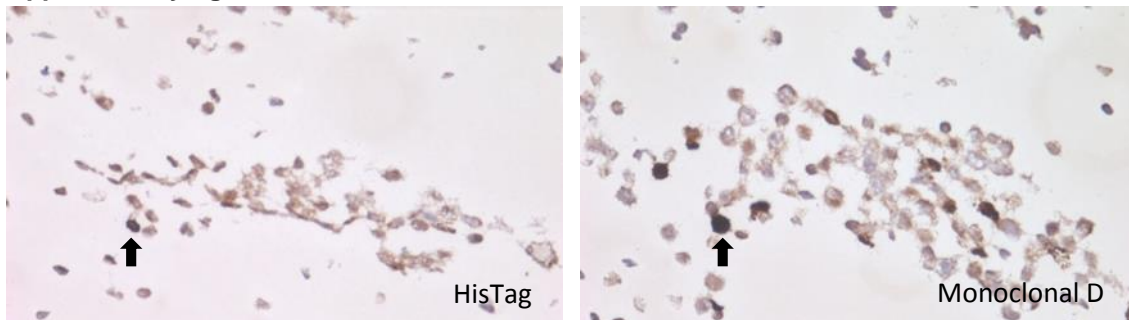

### Supplementary figure 2. Carnosine synthase (CARNS) (ATPGD1) antibody specificity

The antibody for CARNS was provided by the group of F. Margolis, who isolated the enzyme in a previous study (Margolis, 1987), before the gene for CARNS was discovered in 2010 (Drozak, 2010). By performing double staining with this antibody and anti-HisTag antibody on cryo sections of MNGG cells transfected with HisTag labelled CARNS protein. Arrows show the colocalization between the

### Supplementary figure 3.

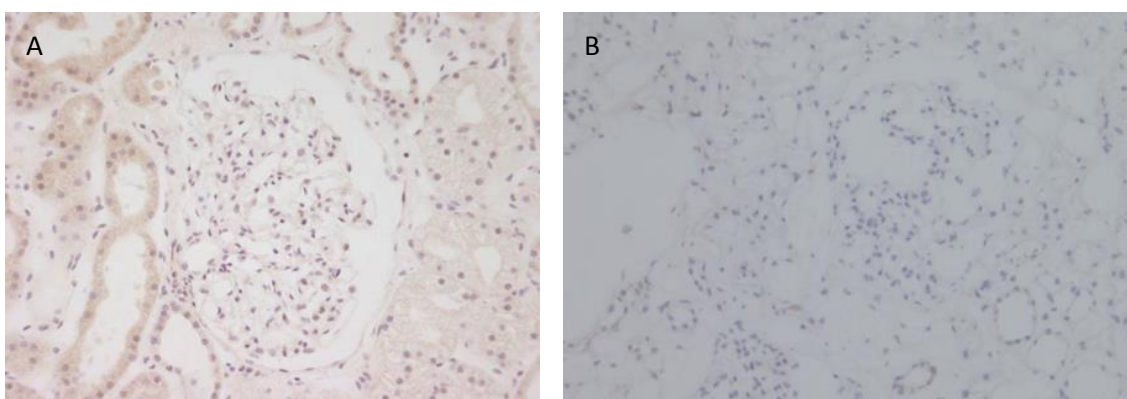

### Supplementary figure 3. Negative controls of CNDP1 and CARNS A: negative control of CNDP1(pre-immun serum)

B: negative control of CARNS (normal mouse serum and immunoglobulin fraction)
